# 1 **Marine reserve benefits and recreational fishing yields: the winners** 2 **and the losers**

3 *Short title: Long-term marine protected area performance for fish and fishermen*

4  
5 Mohsen Kayal<sup>a,b,c,\*</sup>, Marine Cigala<sup>a,b</sup>, Eléonore Cambra<sup>a,b</sup>, Nelly Soulat<sup>d</sup>, Manon Mercader<sup>a,b</sup>,  
6 Audrey Lebras<sup>a,b</sup>, Pauline Ivanoff<sup>a,b</sup>, Léa Sébés<sup>a,b</sup>, Aurélie Lassus-Debat<sup>e</sup>, Virginie Hartmann<sup>f</sup>,  
7 Mélissa Bradtke<sup>a,b</sup>, Philippe Lenfant<sup>a,b</sup>, Coraline Jabouin<sup>g</sup>, Julien Dubreuil<sup>h</sup>, Dominique Pelletier<sup>i</sup>,  
8 Manon Joguet<sup>g,j</sup>, Solène Le Mellionnec<sup>a,b</sup>, Marion Brichet<sup>k</sup>, Jean-Louis Binche<sup>f</sup>, Jérôme Payrot<sup>f</sup>,  
9 Gilles Saragoni<sup>a,b</sup>, Romain Crec'hriou<sup>a,b</sup>, Marion Verdoit-Jarraya<sup>a,b</sup>

10

11 <sup>a</sup>UPVD-CNRS, Centre de Formation et de Recherche sur les Environnements Méditerranéens,  
12 UMR 5110, Université de Perpignan Via Domitia, Perpignan, France

13 <sup>b</sup>Centre de Recherche sur les Ecosystèmes Marins (CREM), Port-Barcarès, France

14 <sup>c</sup>Institut de Recherche pour le Développement, UMR 9220 ENTROPIE, IRD, Université de la  
15 Réunion, IFREMER, CNRS, Université de la Nouvelle-Calédonie, Nouméa, New Caledonia

16 <sup>d</sup>SEANEO, Perpignan, France

17 <sup>e</sup>Parc naturel régional de Camargue, Arles, France

18 <sup>f</sup>Département des Pyrénées-Orientales, Réserve Naturelle Marine de Cerbère-Banyuls, Banyuls-  
19 sur-Mer, France

20 <sup>g</sup>Parc naturel marin du golfe du Lion, Argelès-sur-Mer, France

21 <sup>h</sup>Comité Régional des Pêches Maritimes et des Elevages Marins de Bretagne, Rennes, France

22 <sup>i</sup>EMH, Institut Français de Recherche pour l'Exploration de la Mer (IFREMER), Nantes, France

23 <sup>j</sup>FROM Nord, Boulogne-sur-Mer, France

24 <sup>k</sup>Direction Interrégionale de la Mer Méditerranée, Marseille, France

25 \*Corresponding author: Email: [mohsen.kayal@ird.fr](mailto:mohsen.kayal@ird.fr) (MK)

26

## 27 **Abstract**

28 Marine reserves constitute effective tools for preserving fish stocks and associated human  
29 benefits. However, not all reserves perform equally, and predicting the response of marine  
30 communities to management actions in the long run is challenging. Our decadal-scale survey of  
31 recreational fishing yields at France's 45-year old Cerbère-Banyuls marine reserve indicated  
32 significant protection benefits, with 40-50% higher fishing yields per unit effort in the partial-  
33 protection zone of the reserve (where fishing is permitted but at a lower level) than in  
34 surrounding non-reserve areas. Over the period 2005-2014, catch per unit effort (CPUE) showed  
35 a similar pattern of decline inside and outside the reserve while weight per unit effort (WPUE)  
36 increased by 131% inside and decreased by 60% outside. Different CPUE and WPUE  
37 trajectories among fish families indicated changing catch assemblages, with yields increasing for  
38 the family most valued by fisheries, Sparidae (the ecological winners). However, reserve benefits  
39 were restricted to off-shore fishermen (the social winners), as on-shore yields were ~4 times  
40 lower and declining, even inside the reserve. Our study illustrates how surveys of recreational  
41 fishing yields can help evaluate the effectiveness of marine protected areas for key social and  
42 ecological protagonists. We show that, more than four decades after its establishment, fishing  
43 efficiencies at the historical Cerbère-Banyuls marine reserve are still changing, but benefits in  
44 terms of catch abundance, weight, and composition remain predominantly restricted to off-shore  
45 fishermen. Further regulations appear necessary to guarantee that conservation strategies  
46 equitably benefit societal groups.

## 47 **Introduction**

48           Despite increasing management efforts, the decline of fishing yields remains a global  
49 concern (FAO, 2018). This is especially true in the Mediterranean Sea where human impacts to  
50 the marine environment are diverse, intense, and increasing (Coll, 2010). Indeed, the  
51 Mediterranean is considered the most overfished marine basin on the planet and poses severe  
52 management challenges, as exploitation of marine resources in this nearly-enclosed sea is shared  
53 among 21 bordering countries whose economic development is tied to activities impinging on  
54 the marine environment (Gaudin and De Young, 2007; Piante and Ody, 2015; Randone et al.,  
55 2017). While Mediterranean marine biota are threatened by a multitude of anthropogenic  
56 stressors including pollution and eutrophication, climate change, invasive species, marine  
57 transport, aquaculture, and tourism, the major historical and current drivers of declining  
58 biodiversity and productivity are habitat loss and fishing (Coll et al., 2010; Abdul Malak et al.,  
59 2011).

60           Fish landings in the Mediterranean have been decreasing since the mid-1980's, despite  
61 expanding fishing efforts toward lower trophic levels and the deeper sea (Pauly et al., 1998;  
62 Pauly and Zeller, 2016; FAO, 2018). This decreasing catch rate has resulted in declines of  
63 commercial fishing activities. In contrast, recreational fishing has been on the rise, particularly  
64 along the European coast of the Mediterranean (Gaudin and De Young, 2007; Font and Lloret,  
65 2014; Piante and Ody, 2015). As in many other regions, the relative contributions of commercial  
66 versus recreational fishing to the local socio-economy and decline of fish stocks have yet to be  
67 quantified throughout the Mediterranean (Cooke and Cowx, 2006; Roncin et al., 2008; Marengo  
68 et al., 2015; Pauly and Zeller, 2016), though recreational fishing is suspected to exert a strong  
69 and increasing pressure, particularly on highly targeted marine species (Post et al., 2002;

70 Coleman et al., 2004; Morales-Nin et al., 2005; Font and Lloret, 2014; Arlinghaus et al., 2019).  
71 In the Mediterranean and elsewhere, strategies for preserving fish stocks consist primarily of  
72 regulating fishing efforts through gear restrictions (gear type and number), fishing yields through  
73 quotas (catch size and bag limits), and fishing areas and seasons through exclusion zones and  
74 marine reserves (Cooke and Cowx, 2006; Abdul Malak et al., 2011). However, the long term  
75 effectiveness of these management strategies for preserving species abundance and ecosystem  
76 services is difficult to predict (Babcock et al., 2010; Di Franco et al., 2016). In the face of such  
77 uncertainties, the preservation of fisheries resources and associated socio-economic benefits  
78 poses serious regulatory challenges (Gaudin and De Young, 2007; Zafra-Calvo et al., 2019). In  
79 this context, identifying social and ecological protagonists vulnerable to environmental decline  
80 can help define adaptive management (McKinney and Lockwood 1999; Jantke et al., 2018;  
81 Kayal et al. 2019).

82 We performed a decadal scale survey (2005-2014) of recreational fishing activities at the  
83 Cerbère-Banyuls marine reserve (Fig 1), one of the oldest marine protected areas in the  
84 Mediterranean, to evaluate the effectiveness of local management efforts in preserving fisheries  
85 resources. The survey consisted of ~1,500 on-site interviews with recreational fishermen fishing  
86 inside and outside the reserve, and recorded ~6,000 individual catches representing a total weight  
87 of ~1 ton for a fishing effort of ~5000 line-hours. Within the reserve, fishing is subject to  
88 restrictions (gear restrictions and bag and size limits, see section 2.1.) and only takes place in a  
89 buffer zone of partial protection surrounding the fully protected no-take area (Fig 1). In contrast,  
90 no restrictions apply outside of the reserve where fishing follows the French national regulation  
91 for the Mediterranean Sea. Therefore, we hypothesized that fishing yields would differ between  
92 the partial protection zone of the reserve, which benefits from the vicinity of the fully protected

93 no-take area and undergoes restricted fishing pressure, as compared to surrounding no-reserve  
94 areas. Similarly, because reserve benefits are often not equally distributed in space and among  
95 species undergoing different fishing pressure (Mosquera et al. 2000; Goñi et al., 2008; Babcock  
96 et al., 2010; Rocklin et al., 2011; Kerwath et al., 2013), we also hypothesized that reserve  
97 benefits would differ for fishermen fishing on-shore (access limited to the coastline of the  
98 reserve) and off-shore (unrestricted boat access to the entire reserve), as well as among fish  
99 families differently targeted by fisheries.

100

101 **Fig 1** Map of the study area indicating the position of the Cerbère-Banyuls marine reserve's fully  
102 protected core area (no-take zone), buffer zone of partial protection (fishing allowed with  
103 restrictions, see section 2.1.), and control outside area (no specific regulation on fishing) in  
104 relation to the towns of Banyuls-sur-Mer and Cerbère and the two capes, Cap Béar and Cap  
105 Cerbère. Established in 1974, Cerbère-Banyuls is one of the oldest marine protected areas of the  
106 Mediterranean Sea. The arrow in the insert indicates the position of the reserve in the natural  
107 marine park of the Gulf of Lion situated in the north-western corner of the Mediterranean, at the  
108 border between France and Spain. Isobaths indicate depth variation every 10 meters.

109

110 We used three biological indicators commonly used to characterize fishing yields: catch  
111 abundance, weight, and composition. We tested for differences in catch per unit effort (CPUE)  
112 and weight per unit effort (WPUE) between fishermen fishing inside versus outside of the  
113 reserve, as well as on-shore along the coastline versus off-shore from boats. CPUE and WPUE  
114 trajectories were also compared among the three dominant fish families, namely Sparidae (sea  
115 breams), Serranidae (groupers), and Labridae (wrasses), each exhibiting different levels of

116 species diversity, occupying different positions in habitats and trophic levels, and with different  
117 values for fisheries (Gaudin and De Young, 2007; Font and Lloret, 2014; Giovos et al., 2018; S1  
118 Table). Based on an unprecedented survey of recreational fishing activities in the Mediterranean,  
119 our study provides a decadal-scale evaluation of the effectiveness of the Cerbère-Banyuls nature  
120 reserve, one of the most preserved marine reserves in the region (see Methods section), for  
121 supporting fishing yields. Our results shed light on the consequences of fishing regulations for  
122 key social and ecological protagonists with implications for adaptive management of fishery  
123 resources.

124

## 125 **Methods**

### 126 *The Cerbère-Banyuls natural marine reserve*

127 The Cerbère-Banyuls natural marine reserve ([www.reserves-naturelles.org/cerbere-](http://www.reserves-naturelles.org/cerbere-banyuls)  
128 [banyuls](http://www.reserves-naturelles.org/cerbere-banyuls)) is a French marine protected area situated in the north-western corner of the  
129 Mediterranean Sea (Fig 1). Established in 1974, it is one of the oldest marine reserves in the  
130 Mediterranean and is managed by the Departmental Council of the Pyrénées-Orientales. With  
131 over 100,000 annual visitors, including more than 30,000 scuba-divers in recent years, the  
132 Cerbère-Banyuls marine reserve contributes greatly to the region's community character and  
133 socio-economic development (Goñi, R. et al. 2008; Roncin et al., 2008). Thanks to its  
134 exceptional ecological wealth and exemplary management, the reserve is recognized since 2014  
135 as one of the 40 sites listed on IUCN's Green List of Protected Natural Areas ([www.iucn.org](http://www.iucn.org)),  
136 and is since 2018 among the 16 Blue Parks distinguished as outstanding marine protected areas  
137 by the Marine Conservation Institute (<https://globaloceanrefuge.org>). Since 2011, the reserve is  
138 part of the larger, 4,010 km<sup>2</sup> in area natural marine park of the Gulf of Lion ([6](http://www.parc-marin-</a></p></div><div data-bbox=)

139 [golfe-lion.fr](http://golfe-lion.fr)). This is the largest marine park in the Mediterranean Sea, and is managed by the  
140 French Agency for Biodiversity. At this stage, there are no restrictions regarding fishing and  
141 other human usages in the park, though scientists, managers, and representatives regularly hold  
142 discussions through committees, workshops and ongoing projects to deliberate on future plans.

143         The reserve comprises a small nucleus of 65 ha of fully protected area, where only  
144 recreational navigation, surface swimming, and scientific diving are authorized (Fig 1). This area  
145 is surrounded by a larger, 650 ha buffer zone of partial protection where recreational activities  
146 such as scuba-diving, boating, and daytime angling are authorized, but subject to quotas and  
147 restrictions that are stricter than the general French coastal fishing regulations for the  
148 Mediterranean Sea which apply outside of the reserve (Lenfant et al., 2011; PNMGL, 2014;  
149 Verdoit-Jarraya et al., 2014). During the studied period, anglers in the reserve were restricted to a  
150 maximum of 2 lines with up to 6 hooks if fishing on-shore, and 12 hooks if fishing from a boat.  
151 No restrictions on lines and hooks applied outside of the reserve. The number of recreational  
152 fishermen fishing in the reserve is regulated by a free but mandatory annual permit; up to 1,500  
153 permits were issued annually over the course of this study. Species-specific minimum catch sizes  
154 and maximum bag limits also apply, and spearfishing is forbidden within the reserve (PNMGL,  
155 2014). Some commercial fishing also takes place in the partial protection zone of the reserve,  
156 with a fleet of 4-15 artisanal boats registered annually during the studied period (Roncin et al.,  
157 2008). Surveys of recreational and commercial fishing indicate that catches around the Cerbère-  
158 Banyuls marine reserve consist primarily of fish belonging to the families Sparidae, Serranidae,  
159 and Labridae (Lenfant et al., 2011; Verdoit-Jarraya et al., 2014; S1 Table). The reserve also hosts  
160 recovering populations of dusky grouper (*Epinephelus marginatus*, family Serranidae) and

161 brown meagre (*Sciaena umbra*, family Sciaenidae) which are protected from fishing by national  
162 moratoria.

163

### 164 ***Survey methodology and design***

165       Recreational fishing activities in and around the Cerbère-Banyuls marine reserve were  
166 surveyed during four monitoring campaigns performed in 2005, 2009, 2010-2011, and 2013-  
167 2014 in an area expanding from Cap Béar in the north to Cap Cerbère in the south and with a  
168 water depth ranging 0-90 m (Fig 1). Recreational fishing refers here to all non-commercial  
169 fishing activities that are carried out mainly for leisure, where catches are either used for  
170 personal consumption, offered to family or friends, or released; the sale of recreational fishing  
171 yield being illegal by definition (Gaudin and De Young, 2007). It encompasses multiple forms of  
172 activities performed on- and off-shore, mainly angling, trolling, spearfishing, and shellfish  
173 gathering (Morales-Nin et al., 2005; Font and Lloret, 2014; Arlinghaus et al., 2019).

174       Surveys consisted of on-site interviews with fishermen in a roving creel survey design  
175 (Pollock et al., 1994). Fishing gear and effort (number and type of lines and hooks, fishing  
176 duration, etc.) as well as catch abundance, composition, and size were recorded, including of  
177 discarded specimen. The survey instrument was a structured interview featuring a standardized  
178 list of questions asked to each participant (Verdoit-Jarraya et al., 2014). Among the multiple  
179 approaches that can be used to quantify fishing yields (e.g. scientific campaigns, fisheries  
180 logbooks, telephonic surveys; Verdoit et al., 2003; Coleman et al., 2004; Morales-Nin et al.,  
181 2005), on-site interviews with recreational fishermen have the advantage of maximizing data  
182 acquisition in time and space while supporting robust data quality via direct observation of social  
183 and ecological descriptors of fisheries (e.g. fishermen abundance, fishing efforts and techniques,



184 catch characteristics). This form of participatory science also promotes positive interactions with  
185 fishermen via frequent contact with users (e.g. for increasing awareness and building trust in  
186 management strategies). Limitations of such interview-based approaches include the dependency  
187 of data quality on user responses to questionnaires. Although the proportion of unreported catch  
188 is difficult to evaluate, our interviews indicated that many local fishermen recognized the role of  
189 the reserve in preserving marine resources, and it is likely that the majority were honest in their  
190 responses. Nevertheless, we assumed the proportion of unreported catch to be relatively constant  
191 over time, with no implication on the dynamics of fishing yields as quantified in our study.

192 Our surveys specifically targeted anglers, who constitute the largest proportion of the  
193 local recreational fishing population, fish throughout the year, and are easy to approach for  
194 interviews. Fishing gear commonly used by anglers in the study area consist primarily of lures  
195 and baited hooks mounted on lines thrown by hand or rod and equipped with weights or floaters  
196 (Verdoit-Jarraya et al., 2014). Catch sizes were measured when possible, or otherwise estimated  
197 visually or based on fishermen's declarations (e.g. for discarded yields). Catch weights were  
198 estimated using length-weight relationships of species from the literature with locally estimated  
199 parameters when available (Crec'hriou et al., 2012; [www.fishbase.org](http://www.fishbase.org)). Fishing efforts (in  
200 line.hour) were calculated based on the number of fishing lines and hooks used by each  
201 fishermen, and the time spent between when the fishermen declared starting fishing and the  
202 interview. Fishing yield was quantified by calculating catch per unit effort (CPUE, number per  
203 line per hour) and weight per unit effort (WPUE, gram per line per hour) for all species  
204 combined, as well as individually for the three major fish families recorded (Sparidae,  
205 Serranidae, Labridae) which represented >85% of catches in number and >65% of the overall  
206 weight captured (see S1 Table for a list of the species recorded for each family). CPUE and

207 WPUE are standard metrics of fishing yields per unit of effort, facilitating comparisons of  
208 efficiency among different fishing techniques, targets, and regulations (Verdoit et al., 2003;  
209 Rocklin et al., 2011; Howarth et al., 2016).

210 A total of 1,481 interviews were performed between 2005 and 2014, including 493 within  
211 the reserve and 988 in surrounding areas (Fig 1). All interviews took place during daytime, and  
212 targeted randomly-selected recreational anglers on-shore along the beaches, jetties, and rocky  
213 coastline (650 interviews), and off-shore onboard small, typically 4-7 m boats (831 interviews).  
214 Interviews were conducted anonymously after informed consent for study participation from  
215 each subject.

216

### 217 *Statistical analyses*

218 We used generalized linear models to evaluate spatio-temporal variability in CPUE and  
219 WPUE between inside and outside the reserve, for fishermen fishing on- and off-shore, for all  
220 species catches and each of the 3 major fish families (Sparidae, Serranidae, Labridae). The  
221 models tested for differences in yield trajectories in CPUE and WPUE in time (continuous  
222 variable *Time*), space (categorical variable *Reserve*: in vs out), among fishermen groups  
223 (categorical variable *Fishermen*: on- vs off-shore), and their interactions (S2 Table). For clarity  
224 and ease of narration, changes in fishing yields are described sequentially, from the main effects  
225 of the reserve and time alone (Fig 2), to the additional effects of fishermen groups (Fig 3) and  
226 fish families (Fig 4). Preliminary tests of deviance of model residuals indicated a negative-  
227 binomial distribution of the data. All modeling and graphing were coded in R statistical software  
228 (R Core Team) complemented by the MASS package (Ripley et al., 2019). We found similar

229 results when considering fishing effort as number of hooks per hour or number of lines per hour  
230 (e.g. S1 Fig), only the latter being reported below.

231

## 232 **Results**

### 233 *All species catches*

234 Over the course of the study, a total of 5,864 individual catches for a fishing effort of  
235 5,028.9 line-hours, and a total fishing yield of 947.0 kg for a fishing effort of 4,970.7 line-hours,  
236 were recorded. The average catch per unit effort (CPUE) for the period 2005-2014 was  $1.7 \pm 1.0$   
237 SE ind.line<sup>-1</sup>.h<sup>-1</sup>, and the average weight per unit effort (WPUE) was  $228.7 \pm 1.1$  SE g.line<sup>-1</sup>.h<sup>-1</sup>.  
238 Overall, fishing yield inside the buffer zone of partial protection in the reserve was 1.4 times  
239 higher in terms of catch abundance (CPUE= $2.1 \pm 1.1$  SE vs  $1.5 \pm 1.1$  SE ind.line<sup>-1</sup>.h<sup>-1</sup>,  $p=0.002$ )  
240 and 1.5 times higher in weight as compared with surrounding areas (WPUE= $288.5 \pm 1.1$  SE vs  
241  $198.8 \pm 1.1$  SE g.line<sup>-1</sup>.h<sup>-1</sup>,  $p=0.018$ ). However, CPUE (Fig 2a) followed a similar pattern of  
242 decline inside (-58%, from 2.5 to 1.1 ind.line<sup>-1</sup>.h<sup>-1</sup>) and outside the reserve (-66%, from 2.2 to 0.8  
243 ind.line<sup>-1</sup>.h<sup>-1</sup>) in 2005-2014, while contrasting trajectories were observed in WPUE (Fig 2b) with  
244 values increasing in the reserve (+131%, from 222.3 to 514.0 g.line<sup>-1</sup>.h<sup>-1</sup>) and decreasing outside  
245 (-60%, from 275.3 to 110.1 g.line<sup>-1</sup>.h<sup>-1</sup>; S3 Table).

246

247 **Fig 2** Trends in catch per unit effort (CPUE, a) and weight per unit effort (WPUE, b) of  
248 recreational fishermen fishing inside (in) and outside (out) the Cerbère-Banyuls marine reserve.  
249 Curves represent mean trajectories estimated by generalized linear models and shadings indicate  
250 95% confidence intervals. The percent changes in mean CPUE and WPUE between the

251 beginning and the end of the study period are provided as text on the plots. See S3 Table for  
252 mean and confidence interval values. Refer to S4 Table for parameter estimates.

253

254 The effects of the reserve on CPUE and WPUE trajectories also differed among the two  
255 fishermen groups (Fig 3, S3 Table). On-shore, fishing yield was in decline both in the reserve (-  
256 39% in CPUE from 0.6 to 0.4 ind.line<sup>-1</sup>.h<sup>-1</sup>, -29% in WPUE from 74.3 to 52.8 g.line<sup>-1</sup>.h<sup>-1</sup>) and in  
257 surrounding areas (-53% in CPUE from 1.0 to 0.5 ind.line<sup>-1</sup>.h<sup>-1</sup>, and -85% in WPUE 202.2 to  
258 29.5 g.line<sup>-1</sup>.h<sup>-1</sup>). Off-shore, catch abundance also declined substantially inside (-74% in CPUE  
259 from 4.0 to 1.1 ind.line<sup>-1</sup>.h<sup>-1</sup>) and outside the reserve (-55% in CPUE from 2.9 to 1.3 ind.line<sup>-1</sup>.h<sup>-1</sup>  
260 <sup>1</sup>), but average yield in weight showed a milder decline outside (-17% in WPUE from 320.7 to  
261 264.7 g.line<sup>-1</sup>.h<sup>-1</sup>) and was increasing in the reserve (+61% in WPUE from 336.7 to 543.4 g.line<sup>-1</sup>.h<sup>-1</sup>).  
262 Discriminating catches by fishermen groups alone for the ten-year period revealed on  
263 average a 3.6 times lower catch abundance (CPUE=0.7 ±1.1 SE vs 2.5 ±1.1 SE ind.line<sup>-1</sup>.h<sup>-1</sup>,  
264  $p<0.001$ ) and a 3.9 times lower yield in weight (WPUE=87.9 ±1.1 SE vs 339.5 ±1.1 SE g.line<sup>-1</sup>.h<sup>-1</sup>,  
265  $p<0.001$ ) from land relative to off-shore.

266

267 **Fig 3** Trends in catch per unit effort (CPUE, a) and weight per unit effort (WPUE, b) of  
268 fishermen fishing from land along the coastline (land) vs at sea from boats (sea), and inside (in)  
269 vs outside (out) the Cerbère-Banyuls marine reserve. Curves represent mean trajectories  
270 estimated by generalized linear models and shadings indicate 95% confidence intervals. The  
271 percent changes in mean CPUE and WPUE between the beginning and the end of the study  
272 period are provided as text on the plots. See S3 Table for mean and confidence interval values.  
273 Refer to S4 Table for parameter estimates.

274

275 *Sparidae*

276 Sparidae represented 32% (1,895 ind.) of the total recorded catch, and 47% (440.6 kg) of  
277 the overall yield in weight. An average CPUE<sub>Spar</sub> of  $0.4 \pm 1.1$  SE ind.line<sup>-1</sup>.h<sup>-1</sup> and WPUE<sub>Spar</sub> of  
278  $93.2 \pm 1.1$  SE g.line<sup>-1</sup>.h<sup>-1</sup> were recorded for 2005-2014. Sparidae catch abundance and weight did  
279 not differ significantly between inside and outside the reserve in this period (CPUE<sub>Spar</sub>= $0.4 \pm 1.1$   
280 SE vs  $0.5 \pm 1.1$  SE ind.line<sup>-1</sup>.h<sup>-1</sup>,  $p=0.422$ ; WPUE<sub>Spar</sub>= $100.7 \pm 1.2$  SE vs  $89.4 \pm 1.2$  SE g.line<sup>-1</sup>.h<sup>-1</sup>,  
281  $p=0.641$ ), but were 2 times higher for fishermen off-shore relative to on-shore (CPUE<sub>Spar</sub>= $0.6$   
282  $\pm 1.1$  SE vs  $0.3 \pm 1.1$  SE ind.line<sup>-1</sup>.h<sup>-1</sup>,  $p<0.001$ ; WPUE<sub>Spar</sub>= $119.1 \pm 1.2$  SE vs  $60.2 \pm 1.2$  SE g.line<sup>-1</sup>.h<sup>-1</sup>,  
283  $p=0.006$ ).

284 Between 2005 and 2014, average CPUE<sub>Spar</sub> (Fig 4a) was in decline on-shore both inside  
285 (-73%, from 0.3 to 0.1 ind.line<sup>-1</sup>.h<sup>-1</sup>) and outside the reserve (-34%, from 0.4 to 0.2 ind.line<sup>-1</sup>.h<sup>-1</sup>),  
286 whereas for off-shore fishermen, a comparatively milder decline was observed in the reserve (-  
287 14%, from 0.5 to 0.4 ind.line<sup>-1</sup>.h<sup>-1</sup>) and values were increasing in surrounding areas (+35%, from  
288 0.6 to 0.7 ind.line<sup>-1</sup>.h<sup>-1</sup>; S3 Table). WPUE<sub>Spar</sub> showed a different pattern over this period (Fig 4b);  
289 on-shore values increased in the reserve (+99%, from 34.2 to 68.0 g.line<sup>-1</sup>.h<sup>-1</sup>) but decreased in  
290 surrounding non-reserve areas (-93%, from 177.4 to 12.8 g.line<sup>-1</sup>.h<sup>-1</sup>), and off-shore values  
291 increased both in the reserve (+78%, from 107.4 to 191.3 g.line<sup>-1</sup>.h<sup>-1</sup>) and in nearby non-reserve  
292 waters (+224%, from 70.8 to 229.5 g.line<sup>-1</sup>.h<sup>-1</sup>). Overall, contrasting WPUE<sub>Spar</sub> trajectories were  
293 observed between fishermen performing on- versus off-shore, independently from being located  
294 inside or outside of the reserve ( $p=0.0013$ , S2 Table).

295

296 **Fig 4** Trends in catch per unit effort (CPUE) and weight per unit effort (WPUE) of recreational  
297 fishermen fishing from land along the coastline (land) vs at sea from boats (sea), and inside (in)  
298 vs outside (out) the Cerbère-Banyuls marine reserve for each of the 3 major fish families  
299 (Sparidae, Serranidae and Labridae). Note differences in scale in y-axes. Curves represent mean  
300 trajectories estimated by generalized linear models and shadings indicate 95% confidence  
301 intervals. The percent changes in mean CPUE and WPUE between the beginning and the end of  
302 the study period are provided as text on the plots. See S3 Table for mean and confidence interval  
303 values. Refer to S4 Table for parameter estimates.

304

### 305 *Serranidae*

306 Serranidae represented 42% (2,471 ind.) of the total recorded catch, and 17% (157.4 kg)  
307 of the overall yield in weight. An average  $CPUE_{Serr}$  of  $0.8 \pm 1.1$  SE ind.line<sup>-1</sup>.h<sup>-1</sup> and  $WPUE_{Serr}$  of  
308  $55.8 \pm 1.1$  SE g.line<sup>-1</sup>.h<sup>-1</sup> were recorded for 2005-2014. Serranidae catch abundance and weight  
309 were respectively 2.4 and 3 times higher in the reserve relative to surrounding areas in this  
310 period ( $CPUE_{Serr}=1.4 \pm 1.2$  SE vs  $0.6 \pm 1.1$  SE ind.line<sup>-1</sup>.h<sup>-1</sup>,  $p<0.001$ ;  $WPUE_{Serr}=99.9 \pm 1.3$  SE vs  
311  $33.7 \pm 1.2$  SE g.line<sup>-1</sup>.h<sup>-1</sup>,  $p<0.001$ ), and 17.3 and 23.3 times higher off-shore than on-shore  
312 ( $CPUE_{Serr}=1.4 \pm 1.1$  SE vs  $0.1 \pm 1.2$  SE ind.line<sup>-1</sup>.h<sup>-1</sup>,  $p<0.001$ ;  $WPUE_{Serr}=96.6 \pm 1.2$  SE vs  $4.1$   
313  $\pm 1.2$  SE g.line<sup>-1</sup>.h<sup>-1</sup>,  $p<0.001$ ).

314 Between 2005 and 2014, Serranidae catch abundance and weight (Fig 4c,d) declined for  
315 off-shore fishermen, both in the reserve (-85% in  $CPUE_{Serr}$  from 3.2 to 0.5 ind.line<sup>-1</sup>.h<sup>-1</sup>, -78%<sub>Serr</sub>  
316 in  $WPUE_{Serr}$  from 226.5 to 49.0 g.line<sup>-1</sup>.h<sup>-1</sup>) as well as in surrounding areas (-81% in  $CPUE_{Serr}$   
317 from 1.5 to 0.3 ind.line<sup>-1</sup>.h<sup>-1</sup>, -76%<sub>Serr</sub> in  $WPUE_{Serr}$  from 88.4 to 21.2 g.line<sup>-1</sup>.h<sup>-1</sup>; S3 Table).  
318 Anglers fishing on-shore outside the reserve also experienced declining  $CPUE_{Serr}$  (-86%, from

319 0.2 to 0.0 ind.line<sup>-1</sup>.h<sup>-1</sup>) and WPUE<sub>Serr</sub> (-51%, from 6.6 to 3.2 g.line<sup>-1</sup>.h<sup>-1</sup>), whereas those fishing  
320 on-shore inside the reserve had increasing CPUE<sub>Serr</sub> (+304%, from 0.0 to 0.1 ind.line<sup>-1</sup>.h<sup>-1</sup>) and  
321 WPUE<sub>Serr</sub> (+17%, from 2.0 to 2.4 g.line<sup>-1</sup>.h<sup>-1</sup>) over time.

322

### 323 *Labridae*

324 Labridae represented 12% (700 ind.) of the total recorded catch, and 3% (25.2 kg) of the  
325 overall yield in weight. An average CPUE<sub>Labr</sub> of 0.2 ±1.1 SE ind.line<sup>-1</sup>.h<sup>-1</sup> and WPUE<sub>Serr</sub> of 8.6  
326 ±1.2 SE g.line<sup>-1</sup>.h<sup>-1</sup> were recorded in 2005-2014. Labridae catch abundance and weight did not  
327 differ significantly between inside and outside the reserve in this period (CPUE<sub>Labr</sub>=0.2 ±1.3 SE  
328 vs 0.3 ±1.2 SE ind.line<sup>-1</sup>.h<sup>-1</sup>,  $p=0.058$ ; WPUE<sub>Labr</sub>=9.9 ±1.4 SE vs 7.9 ±1.3 SE g.line<sup>-1</sup>.h<sup>-1</sup>,  
329  $p=0.616$ ), or among fishermen off-shore as compared with on-shore (CPUE<sub>Labr</sub>=0.3 ±1.2 SE vs  
330 0.2 ±1.2 SE ind.line<sup>-1</sup>.h<sup>-1</sup>,  $p=0.742$ ; WPUE<sub>Labr</sub>=7.9 ±1.3 SE vs 9.4 ±1.4 SE g.line<sup>-1</sup>.h<sup>-1</sup>,  $p=0.696$ ).

331 Labridae catch abundance and weight declined in 2005-2014, both inside and outside of  
332 the reserve as well as for both on- and off-shore fishermen (Fig 4e,f; S3 Table). Along the  
333 shoreline, -65% in CPUE<sub>Labr</sub> (from 0.3 to 0.1 ind.line<sup>-1</sup>.h<sup>-1</sup>) and -93% in WPUE<sub>Labr</sub> (from 21.7 to  
334 1.6 g.line<sup>-1</sup>.h<sup>-1</sup>) were estimated in the reserve, and -67% in CPUE<sub>Labr</sub> (from 0.4 to 0.1 ind.line<sup>-1</sup>.h<sup>-1</sup>.  
335 <sup>1</sup>) and -80% in WPUE<sub>Labr</sub> (from 12.5 to 2.5 g.line<sup>-1</sup>.h<sup>-1</sup>) in surrounding areas. For off-shore  
336 fishermen, -98% in CPUE<sub>Labr</sub> (from 0.3 to 0.0 ind.line<sup>-1</sup>.h<sup>-1</sup>) and -83% in WPUE<sub>Labr</sub> (from 9.5 to  
337 1.6 g.line<sup>-1</sup>.h<sup>-1</sup>) were estimated within the reserve, and -70% in CPUE<sub>Labr</sub> (from 0.5 to 0.2  
338 ind.line<sup>-1</sup>.h<sup>-1</sup>) and -81% in WPUE<sub>Labr</sub> (from 14.2 to 2.7 g.line<sup>-1</sup>.h<sup>-1</sup>) in surrounding waters.

339

## 340 **Discussion**

### 341 *Effectiveness of the reserve*

342           Understanding how marine species respond to conservation actions is crucial for  
343 successful management of fisheries resources. At the historical site of Cerbère-Banyuls, catch  
344 abundances and weights for recreational fishermen were respectively 40% and 50% higher  
345 within the buffer zone of partial protection in the reserve than in surrounding areas, indicating  
346 significant benefits of the reserve in supporting fishing yield. Fishing restrictions inside the  
347 reserve did not protect against the general pattern of decline in catch per unit effort (CPUE)  
348 observed in non-reserve areas in 2005-2014, but did support increasing weight per unit effort  
349 (WPUE) despite declining values outside the reserve. This indicates changing fishing yields in  
350 the reserve through time, with fewer catches overall but an increase in the size of fish that are  
351 caught. This finding differs from those reporting increases in catch abundance inside protected  
352 areas (Kerwath et al., 2013; Marengo et al., 2015; Howarth et al., 2016), which might be due to  
353 the relatively old age of the Cerbère-Banyuls reserve established in 1974. Indeed, marine  
354 reserves promote prolific marine populations, including large predatory species that take longer  
355 to re-establish and, through time, are expected to increasingly regulate the abundance of smaller  
356 assemblages via trophic cascades (Mosquera et al., 2000; Schroeder et al. 2002; Molloy et al.,  
357 2009; Babcock et al., 2010; Rocklin et al., 2011). For example, the Cerbère-Banyuls marine  
358 reserve hosts a recovering population of the large predator dusky grouper (*Epinephelus*  
359 *marginatus*) whose abundance has been increasing from 10 individuals in 1986 to 608 in 2018  
360 (the population abundance over our study period being 202 in 2006 and 429 in 2014; Pastor and  
361 Payrot, 2014; [www.gemlemerou.org](http://www.gemlemerou.org)). While the consequences of the loss of large predators for  
362 the dynamics of ecosystems is a global concern (Heithaus et al., 2008; Estes et al., 2011), further



363 investigation is necessary to evaluate the effects of the return of top predators on fisheries  
364 resources and marine biota at the Cerbère-Banyuls marine reserve.

365

### 366 *Unequal benefits of the reserve*

367         The benefits of the reserve in promoting fishing yields were limited to off-shore  
368 fishermen, whereas on-shore fishermen experienced on average ~4 times lower and declining  
369 fishing efficiencies, even within the perimeter of the reserve. Differences in site accessibility and  
370 therefore fishing pressure may explain this outcome (Post et al., 2002; Roncin et al., 2008).  
371 While off-shore fishing is restricted to boat users and segregates fishing effort in a two-  
372 dimensional space throughout the reserve, the near-shore is potentially accessible to all  
373 fishermen and concentrates fishing pressure on a few accessible sites (mostly along beaches and  
374 jetties) along the mono-dimensional stretch of the coastline (Fig 1). Moreover, near-shore  
375 habitats are typically more exposed to other forms of degradation that impact marine biota,  
376 including pollution and artificialization of the coastline (Coll et al., 2010; Abdul Malak et al.,  
377 2011; Mercader et al., 2018). Spearfishing, which is often pointed to as a major driver of fish  
378 decline in shallow water habitats (Jouvenel and Pollard, 2001; Rocklin et al., 2011; Marengo et  
379 al., 2015), has been forbidden within the Cerbère-Banyuls marine reserve since 1974, and model  
380 simulations indicate that further reducing recreational fishing pressure by 50% could  
381 significantly improve stocks of targeted fish species in the area (Hussein et al., 2011a,b). In  
382 2016, after the period covered by this study, additional restrictions were implemented to regulate  
383 recreational fishing pressure within the reserve, anglers being now limited to a maximum of 2  
384 lines with up to 4 hooks if fishing on-shore and 8 hooks off-shore, and the total number of  
385 fishermen is now restricted to 1,000 free but mandatory annual permits. While the effects of

386 these new measures on fishing efforts and yields remain to be evaluated, the number of fishing  
387 permits could further be reduced in the future as annual user-permit demands have been below  
388 the 1,000 threshold in recent years. Nevertheless, there is growing concern that declining fishing  
389 yields could jeopardize the popularity of recreational fishing, an emblematic activity in the  
390 region, with significant economic consequences for the associated sectors including bait markets,  
391 harbors, and tourism.

392

### 393 *Changing catch composition*

394 Spatial differences in fishing yield were found among dominant fish families, suggesting  
395 a spatial segregation of fish populations. Average catch abundance and weight in the 10-year  
396 period did not differ significantly between inside and outside of the reserve for Labridae and  
397 Sparidae, but were 2-3 times higher in the reserve for Serranidae. Similarly, equivalent levels of  
398 catch abundance and weight were found on- and off-shore for Labridae, while yields were twice  
399 higher off-shore for Sparidae and ~20 times higher for Serranidae. The heterogeneity of benthic  
400 habitats was previously found to influence spatial variability in fish assemblage abundance and  
401 composition more strongly than protection status at the Cerbère-Banyuls marine reserve (Claudet  
402 et al., 2011). However, contrasting trajectories in fishing yield among fish families over the study  
403 period indicated differences in exploitation and/or replenishment of populations and, therefore,  
404 changing fish assemblages. For Sparidae, fishing yields in weight increased over time in the  
405 reserve as well as in surrounding off-shore areas, while no benefits of the reserve were detected  
406 on catch abundances, indicating increasing harvested fish size through time. In contrast, catch  
407 abundance and weight declined in all areas for Labridae and Serranidae, except on-shore in the  
408 reserve where Serranidae catch abundance quadrupled over a decade.

409           The Sparidae family comprises several large and mobile species that are highly targeted  
410 by recreational and commercial fishermen, including *Dentex dentex*, *Sparus aurata*,  
411 *Lithognathus mormyrus*, *Pagrus pagrus*, and *Diplodus sargus* (Jouvenel and Pollard, 2001;  
412 Gaudin and De Young, 2007; Rocklin et al., 2011; Marengo et al., 2015; Giovos et al., 2018; S1  
413 Table). As such, the increasing yields recorded for Sparidae indicate the reserve was effective in  
414 supporting catches of large individuals from species of high-value to fisheries within the  
415 protected area as well as an apparent spillover benefit to adjacent off-shore areas as expected for  
416 effective marine reserves (Mosquera et al., 2000; Goñi et al., 2008; Molloy et al., 2009; Howarth  
417 et al., 2016). In contrast, the species of Labridae and Serranidae found in the Cerbère-Banyuls  
418 marine reserve (S1 Table) are comparatively of low interest to fishermen, which might explain  
419 the small differences in yields found between reserve and non-reserve areas (Rocklin et al., 2011;  
420 Mosquera et al., 2000; Molloy et al., 2009; Claudet et al., 2010). The increasing catch abundance  
421 recorded for Serranidae along the shoreline may reflect the capacity of these relatively small,  
422 substrate-associated fishes to colonize habitats unoccupied by other species, notably large  
423 predatory fish from the family Sparidae (Rocklin et al., 2011). Overall, our decadal-scale  
424 evaluation of recreational fishing yields at the Cerbère-Banyuls marine reserve indicates a  
425 progressive transfer in catch biomass in space from on-shore to off-shore, as well as in  
426 composition from smaller, less-targeted fish to larger species that are of higher value to fisheries.

427

### 428 ***Implications for management***

429           Our study shows that surveys of recreational fishing activities can constitute robust  
430 alternatives for estimating fishery indicators (e.g. CPUE) compared with using data from  
431 commercial fisheries which often have higher uncertainties in declarations on fishing efforts and

432 yields (Pauly and Zeller, 2016; Cabral et al., 2018; Galaz et al., 2018). Our interactions with  
433 recreational fishermen also helped create dialogue between scientists, managers, and citizens,  
434 building awareness of local management actions to support participation and trust. Our results  
435 indicate that, 40 years after its establishment, fishing yields at the Cerbère-Banyuls marine  
436 reserve were still changing, implying complex ecological processes that establish on multi-  
437 decadal timescales following the creation of a reserve. Over the last decade, changes included  
438 shifting catch composition from smaller and less-targeted fish from families Serranidae and  
439 Labridae, which with decreasing yields appear in this context as ecological losers among local  
440 species, to larger Sparidae fishes which are of high value to fisheries and with increasing yields  
441 stand as ecological winners. The benefits of the reserve for local fisheries were however mostly  
442 restricted to fishermen fishing off-shore who, with increasing yields, stand as social winners of  
443 the current management plan, whereas fishermen on-shore, the social losers, suffered ~4 times  
444 lower and declining fishing yields.

445         With mean CPUE ranging 0.4-4.0 ind.line<sup>-1</sup>.h<sup>-1</sup> and mean WPUE ranging 30.5-543.4  
446 g.line<sup>-1</sup>.h<sup>-1</sup> (S3 Table), recreational fishing yields at the Cerbère-Banyuls marine reserve are  
447 within the range of those reported along the north-western Mediterranean coast (Font and Lloret,  
448 2014). Similarly, the decline in shallow-water fishing yield observed locally reflects the broader  
449 pattern of declining near-shore yields at the scale of the entire Mediterranean (Gaudin and De  
450 Young, 2007; Coll et al., 2010; FAO, 2018). As such, local management outcomes at Cerbère-  
451 Banyuls can help define regional plans, though identifying how local success at the small scale  
452 of the reserve (650 ha) can be expanded to the broader scale of the marine park (4,010 km<sup>2</sup>) or  
453 that of the entire Gulf of Lion (Fig 1) remains a challenge. The possibility of multiplying the  
454 number of natural reserves like Cerbère-Banyuls to amplify marine protected area benefits and

455 counter declining fishing yields and coastal degradation in the region is presently under  
456 discussion (Andrello et al., 2015; Magris et al., 2018). Nevertheless, while the increasing yields  
457 for Sparidae attest for the positive effects of the reserve on stocks of targeted fish species, the  
458 decline of near-shore yields poses several challenges, including that of preserving the socio-  
459 economic benefits of fishery activities (both recreational and commercial) and maintaining  
460 access to resources for different user groups (both on- and off-shore), for which group-specific  
461 regulations could be enforced (Schroeder and Love, 2002; Cooke and Cowx, 2006; Gaudin and  
462 De Young, 2007; Roncin et al., 2008). Our findings indicate that current management plans do  
463 not benefit on-shore fishing, undermining equity in this emblematic activity that is historically  
464 accessible to all and particularly popular among vacationers, low-income, and retired people.  
465 Given increasing pressure on common-pool natural resources and growing socio-economic  
466 inequalities, this emerging issue needs to be prioritized in sustainable management actions  
467 (Ostrom et al., 1999; Kayal et al., 2019; Zafra-Calvo et al., 2019).

468

## 469 **Acknowledgements**

470 We would like to thank all the recreational fishermen who accepted to participate in our  
471 interviews. We also thank F. Huguet, C. Pou, C. Marjorie, F. Mirbeau, J. Jean-Baptiste, R.  
472 Neveu, A. Gudefin, and A. Missa for participating in some field trips, and J. Pastor for helping  
473 with boating logistics. We thank the managers of the Cerbère-Banyuls Natural Marine Reserve,  
474 notably M.-L. Licari, J.-F. Laffon, and F. Cadene, as well as of the Natural Marine Park of the  
475 Gulf of Lion, G. Le Corre and H. Magnin, for supporting the realization of our studies. We also  
476 thank the municipalities of Argelès-sur-Mer and Banyuls-sur-Mer for facilitating our surveys by  
477 providing us port space. We are also grateful to J. Ballard for improvements on the manuscript.

## 478 **References**

- 479 Abdul Malak D, Livingstone SR, Pollard D, Polidoro BA, Cuttelod A, Bariche M, et al.  
480 Overview of the Conservation Status of the Marine Fishes of the Mediterranean Sea. IUCN;  
481 2011.
- 482 Andrello M, Jacobi MN, Manel S, Thuiller W, Mouillot D. Extending networks of protected  
483 areas to optimize connectivity and population growth rate. *Ecography*. 2015;38(3): 273-282.
- 484 Arlinghaus R, Abbott JK, Fenichel EP, Carpenter SR, Hunt LM, Alòs J. Governing the  
485 recreational dimension of global fisheries. *Proc Natl Acad Sci USA*. 2019;116(12): 5209-  
486 5213.
- 487 Babcock RC, Shears NT, Alcala AC, Barrett NS, Edgar GJ, Lafferty KD, et al. Decadal trends in  
488 marine reserves reveal differential rates of change in direct and indirect effects. *Proc Natl*  
489 *Acad Sci USA*. 2010;107: 18256-18261.
- 490 Cabral RB, Mayorga J, Clemence M, Lynham J, Koeshendrajana S, Muawanah U, et al. Rapid  
491 and lasting gains from solving illegal fishing. *Nat Ecol Evol*. 2018;2(4): 650.
- 492 Claudet J, Garcia-Charton JA, Lenfant P. Combined effects of levels of protection and  
493 environmental variables at different spatial resolutions on fish assemblages in a marine  
494 protected area. *Conserv Biol*. 2011;25(1): 105-114.
- 495 Claudet J, Osenberg CW, Domenici P, Badalamenti F, Milazzo M, Falcón JM, et al. Marine  
496 reserves: fish life history and ecological traits matter. *Ecol Appl*. 2010;20(3): 830-839.
- 497 Coleman FC, Figueira WF, Ueland JS, Crowder LB. The impact of United States recreational  
498 fisheries on marine fish populations. *Science*. 2004;305(5692): 1958-1960.

- 499 Coll M, Piroddi C, Steenbeek J, Kaschner K, Ben Rais Lasram F, Aguzzi J, et al. The  
500 Biodiversity of the Mediterranean Sea: Estimates, Patterns, and Threats. PLoS ONE.  
501 2010;5(8): e11842.
- 502 Cooke SJ, Cowx IG. Contrasting recreational and commercial fishing: searching for common  
503 issues to promote unified conservation of fisheries resources and aquatic environments. Biol  
504 Conserv. 2006;128(1): 93-108.
- 505 Crec'hriou R, Neveu R, Lenfant P. Length-weight relationship of main commercial fishes from  
506 the French Catalan coast. J Applied Ichthyol. 2012;28: 861-862.
- 507 Di Franco A, Thiriet P, Di Carlo G, Dimitriadis C, Francour P, Gutiérrez NL, et al. Five key  
508 attributes can increase marine protected areas performance for small-scale fisheries  
509 management. Sci Rep. 2016;6: 38135.
- 510 Estes JA, Terborgh J, Brashares JS, Power ME, Berger J, Bond WJ, et al. Trophic downgrading  
511 of planet Earth. Science. 2011;333(6040): 301-306.
- 512 FAO. The State of World Fisheries and Aquaculture 2018 - Meeting the sustainable development  
513 goals. Food and Agriculture Organization of the United Nations; 2018.
- 514 Font T, Lloret J. Biological and ecological impacts derived from recreational fishing in  
515 Mediterranean coastal areas. Rev Fish Sci Aquac. 2014;22(1): 73-85.
- 516 Galaz V, Crona B, Dauriach A, Jouffray JB, Österblom H, Fichtner J. Tax havens and global  
517 environmental degradation. Nat Ecol Evol. 2018;2: 1352-1357.
- 518 Gaudin C, De Young C. Recreational fisheries in the Mediterranean countries: a review of  
519 existing legal frameworks. Food and Agriculture Organization of the United Nations; 2007.

- 520 Giovos I, Keramidas I, Antoniou C, Deidun A, Font T, Kleitou P, et al. Identifying recreational  
521 fisheries in the Mediterranean Sea through social media. *Fisheries Manag Ecol*. 2018;25(4):  
522 287-295.
- 523 Heithaus MR, Frid A, Wirsing AJ, Worm B. Predicting ecological consequences of marine top  
524 predator declines. *Trend Ecol Evol*. 2008;23(4): 202-210.
- 525 Howarth LM, Dubois P, Gratton P, Judge M, Christie B, Waggitt JJ, et al. Trade-offs in marine  
526 protection: multispecies interactions within a community-led temperate marine reserve. *ICES*  
527 *J Mar Sci*. 2016;74(1): 263-276.
- 528 Hussein C, Verdoit-Jarraya M, Pastor J, Ibrahim A, Saragoni G, Pelletier D, et al. Assessing the  
529 impact of artisanal and recreational fishing and protection on a white seabream (*Diplodus*  
530 *sargus sargus*) population in the north-western Mediterranean Sea using a simulation model.  
531 Part 1: Parameterization and simulations. *Fish Res*. 2011;108(1): 163-173.
- 532 Hussein C, Verdoit-Jarraya M, Pastor J, Ibrahim A, Saragoni G, Pelletier D, et al. Assessing the  
533 impact of artisanal and recreational fishing and protection on a white seabream (*Diplodus*  
534 *sargus sargus*) population in the north-western Mediterranean Sea, using a simulation model.  
535 Part 2: Sensitivity analysis and management measures. *Fish Res*. 2011;108(1): 174-183.
- 536 Jantke K, Jones KR, Allan JR, Chauvenet AL, Watson JE, Possingham HP. Poor ecological  
537 representation by an expensive reserve system: evaluating 35 years of marine protected area  
538 expansion. *Conserv Lett*. 2018;11(6): e12584.
- 539 Jouvenel J-Y, Pollard DA. Some effects of marine reserve protection on the population structure  
540 of two spearfishing target-fish species, *Dicentrarchus labrax* (Moronidae) and *Sparus aurata*  
541 (Sparidae), in shallow inshore waters, along a rocky coast in the northwestern Mediterranean  
542 Sea. *Aquat Conserv*. 2001;11: 1-9.



- 543 Kayal M, Lewis H, Ballard J, Kayal E. Humanity and the 21<sup>st</sup> century's resource gauntlet: a  
544 commentary on Ripple et al.'s article "World scientists' warning to humanity: a second  
545 notice". *Rethinking Ecology*. 2019;4: 21-30.
- 546 Kerwath SE, Winker H, Götz A, Attwood CG. Marine protected area improves yield without  
547 disadvantaging fishers. *Nat Comm*. 2013;4: 2347.
- 548 Lenfant, P, Caro A, Neveu R, Jarraya M. Les débarquements de la pêche artisanale : de Leucate  
549 à Port-Vendres. CEFREM; 2012.
- 550 Magris RA, Andrello M, Pressey RL, Mouillot D, Dalongeville A, Jacobi MN, et al. Biologically  
551 representative and well-connected marine reserves enhance biodiversity persistence in  
552 conservation planning. *Conserv Lett*. 2018;11(4): e12439.
- 553 Marengo M, Culioli J-M, Santoni M-C, Marchand B, Durieux EDH. Comparative analysis of  
554 artisanal and recreational fisheries for *Dentex dentex* in a marine protected area. *Fish Manag*  
555 *Ecol*. 2015;22(3): 249–260.
- 556 McKinney ML, Lockwood JL. Biotic homogenization: a few winners replacing many losers in  
557 the next mass extinction. *Trend Ecol Evol*. 1999;14(11): 450-453.
- 558 Mercader M, Rider M, Cheminée A, Pastor J, Zawadzki A, Mercière A, et al. Spatial distribution  
559 of juvenile fish along an artificialized seascape, insights from common coastal species in the  
560 Northwestern Mediterranean Sea. *Mar Env Res*. 2018;137: 60-72.
- 561 Molloy PP, McLean IB, Côté IM. Effects of marine reserve age on fish populations: a global  
562 meta-analysis. *J Appl Ecol*. 2009;46(4): 743-751.
- 563 Morales-Nin B, Moranta J, García C, Tugores MP, Grau AM, Riera F, et al. The recreational  
564 fishery off Majorca Island (western Mediterranean): some implications for coastal resource  
565 management. *ICES J Mar Sci*. 2005;62(4): 727-739.

566 Mosquera I, Côté IM, Jennings S, Reynolds JD. Conservation benefits of marine reserves for fish  
567 populations. In *Animal Conservation forum*. Cambridge University Press. 2000;3(4): 321-  
568 332.

569 Ostrom E, Burger J, Field CB, Norgaard RB, Policansky D. Revisiting the commons: local  
570 lessons, global challenges. *Science*. 1999;284(5412): 278-282.

571 Pauly D, Christensen V, Dalsgaard J, Froese R, Torres F. Fishing down marine food webs.  
572 *Science*. 1998;279(5352): 860-863.

573 Pauly D, Zeller D. Catch reconstructions reveal that global marine fisheries catches are higher  
574 than reported and declining. *Nat Comm*. 2016;7: 10244.

575 Piante, C, Ody D. Blue growth in the Mediterranean Sea: the challenge of good environmental  
576 status. World Wildlife Fund; 2015.

577 Pollock KH, Jones CM, Brown TL. Angler survey methods and their application in fisheries  
578 management. Bethesda: American Fisheries Society; 1994.

579 PNMGL. La mer & l'homme. Argelès-sur-Mer: Parc Naturel Marin du Golfe du Lion; 2014.

580 Post JR, Sullivan M, Cox S, Lester NP, Walters CJ, Parkinson EA, et al. Canada's recreational  
581 fisheries: the invisible collapse? *Fisheries*. 2002;27(1): 6-17.

582 Randone M, Di Carlo G, Constantini M. Reviving the economy of the Mediterranean Sea:  
583 actions for a sustainable future. World Wildlife Fund; 2017.

584 Ripley B, Venables B, Bates DM, Hornik K, Gebhardt A, Firth D. Package 'MASS'. CRAN;  
585 2019. Available at: <https://cran.rproject>.

586 Rocklin D, Tomasini J-A, Culioli J-M, Pelletier D, Mouillot D. Spearfishing regulation benefits  
587 artisanal fisheries: the ReGS indicator and its application to a multiple-use Mediterranean  
588 marine protected area. *PLoS ONE*. 2011;6(9): e23820.

- 589 Roncin N, Alban F, Charbonnel E, Crec'hriou R, De La Cruz Modino R, Culioli JM, et al. Uses  
590 of ecosystem services provided by MPAs: how much do they impact the local economy? A  
591 southern Europe perspective. *J Nat Conserv.* 2008;16(4): 256-270.
- 592 Schroeder DM, Love MS. Recreational fishing and marine fish populations in California.  
593 California Cooperative Oceanic Fisheries Investigations Report. 2002;1: 182-90.
- 594 Verdoit M, Pelletier D, Bellail R. Are commercial logbook and scientific CPUE data useful for  
595 characterizing the spatial and seasonal distribution of exploited populations? The case of the  
596 Celtic Sea whiting. *Aquat Living Resour.* 2003;16(6): 467-485.
- 597 Verdoit-Jarraya M, Soulat N, Mercader M, Lebras A, Huguet F, Pou C, et al. Suivi de l'effort de  
598 pêche et des captures issus de la pêche récréative au sein du parc naturel marin du golfe du  
599 Lion et de la réserve naturelle marine de Cerbère-Banyuls. CEFREM; 2014.
- 600 Zafra-Calvo N, Garmendia E, Pascual U, Palomo I, Gross-Camp N, Brockington D, et al.  
601 Progress toward equitably managed protected areas in Aichi target 11: a global survey.  
602 *BioScience.* 2019;69(3): 191-197.

## 603 **Supporting information**

604

605 **S1 Table** List of the species recorded for each of the three major fish families caught by  
606 recreational fishermen around the Cerbère-Banyuls natural marine reserve.

607

608 **S2 Table** Deviance table of generalized linear models comparing changes in catch per unit effort  
609 and weight per unit effort of recreational fishermen fishing on-shore from the coastline versus  
610 off-shore from boats, and inside versus outside the Cerbère-Banyuls marine reserve.

611

612 **S3 Table** Fishing yields in catch per unit effort and weight per unit effort estimated for  
613 recreational fishermen performing on- and off-shore, inside and outside of the Cerbère-Banyuls  
614 marine reserve at the beginning and end of the survey.

615

616 **S4 Table** Parameter estimates of generalized linear models characterizing trends in catch per unit  
617 effort and weight per unit effort of recreational fishermen fishing on-shore from the coastline  
618 versus off-shore from boats, and inside versus outside the Cerbère-Banyuls marine reserve.

619

620 **S1 Fig** Trends in catch per unit effort and weight per unit effort of recreational fishermen  
621 performing inside vs outside the Cerbère-Banyuls marine reserve with unit effort expressed in  
622 line.hours and in hook.hours.

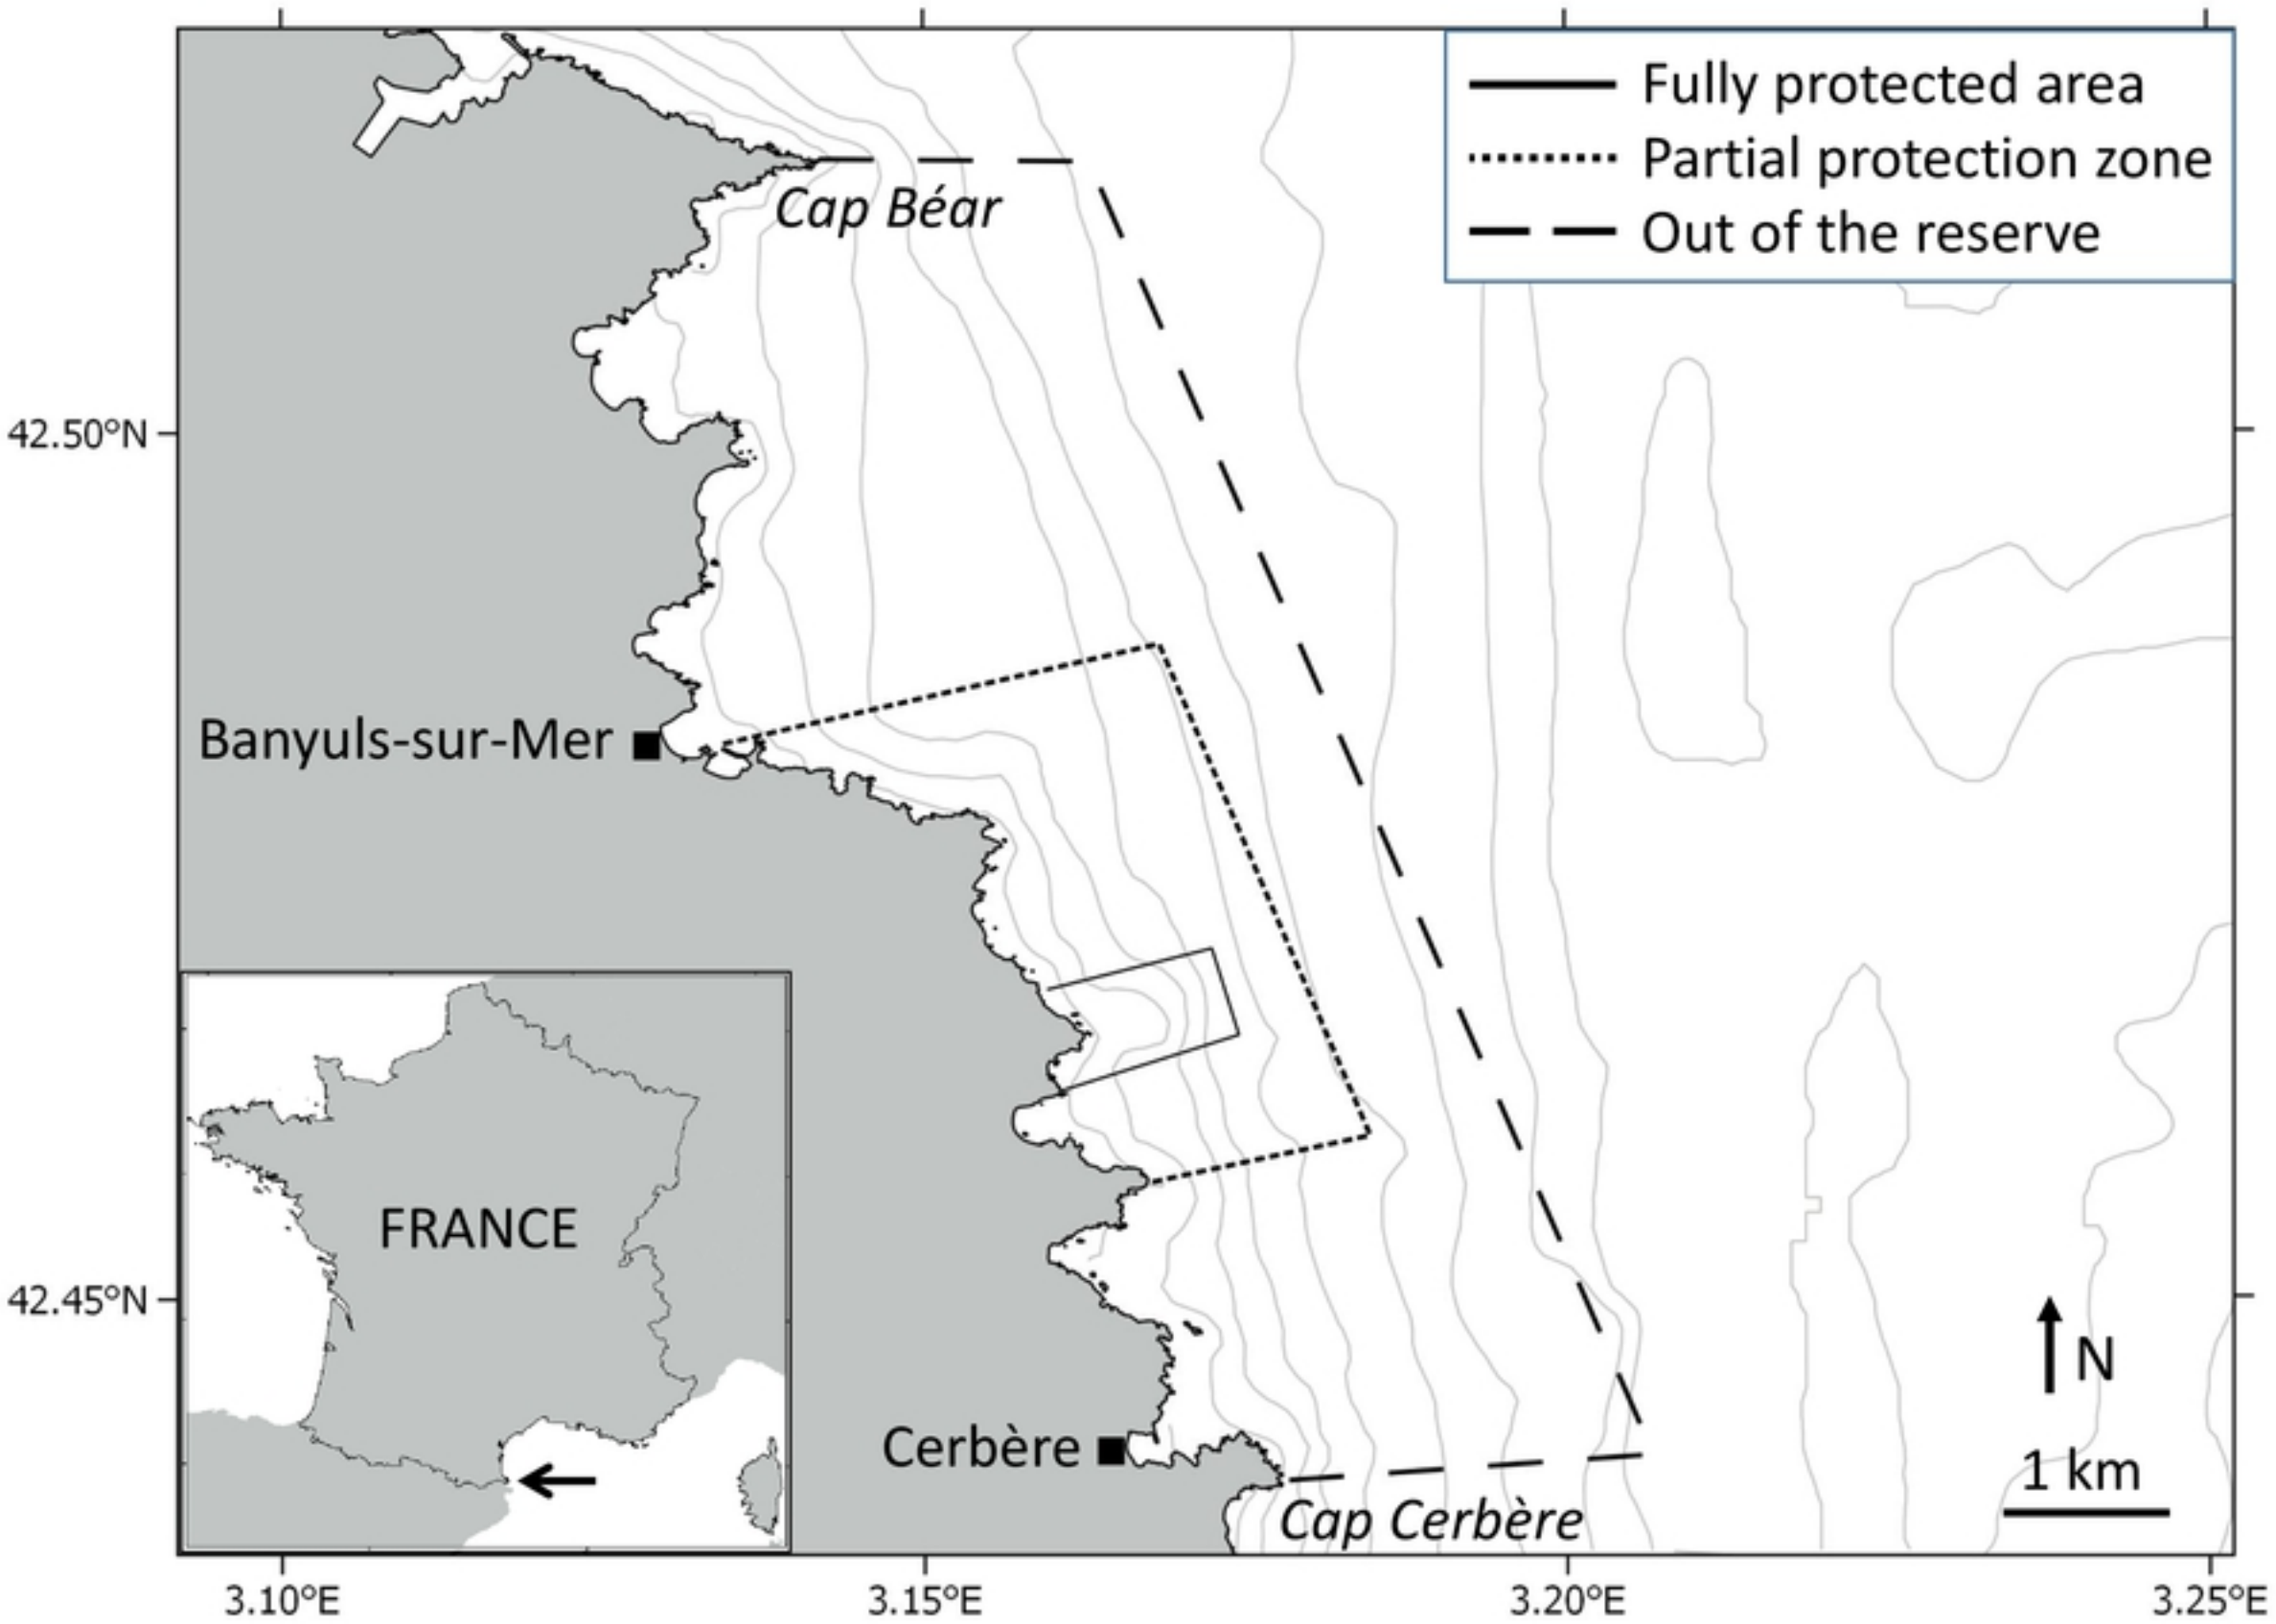

Fig 1

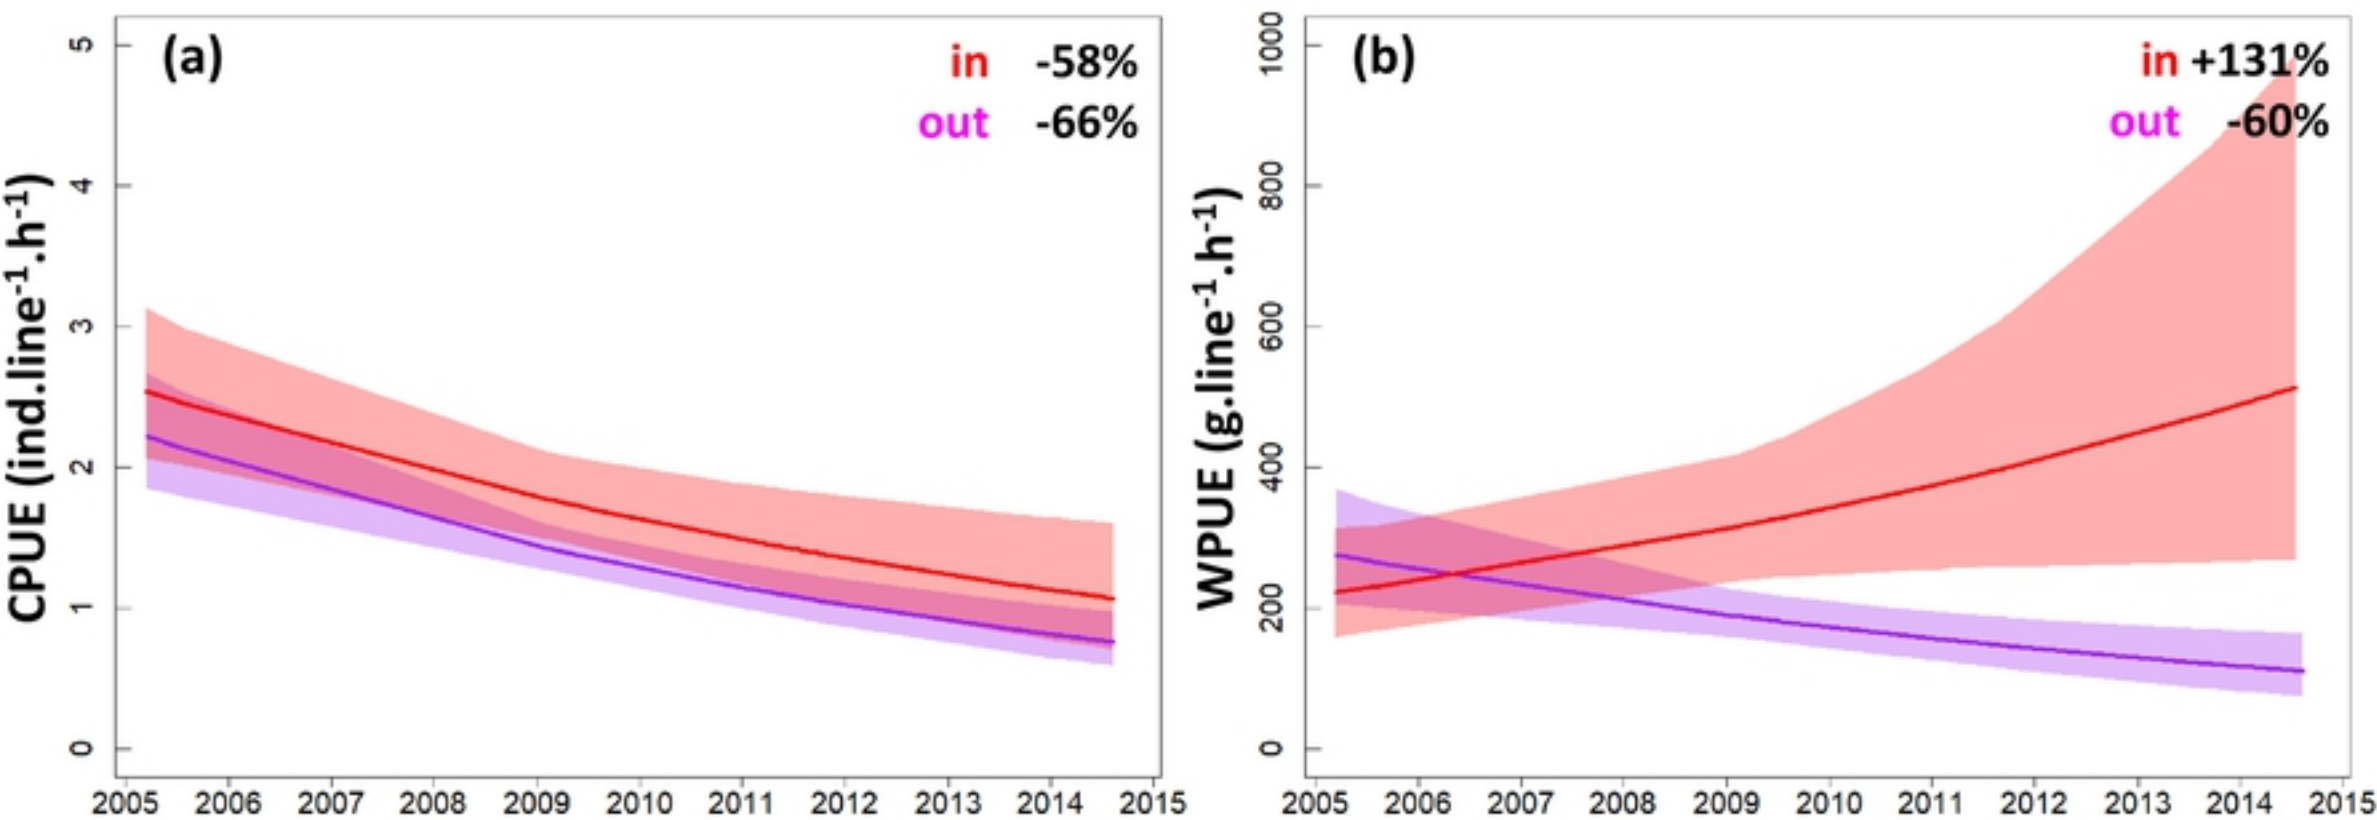

Fig 2

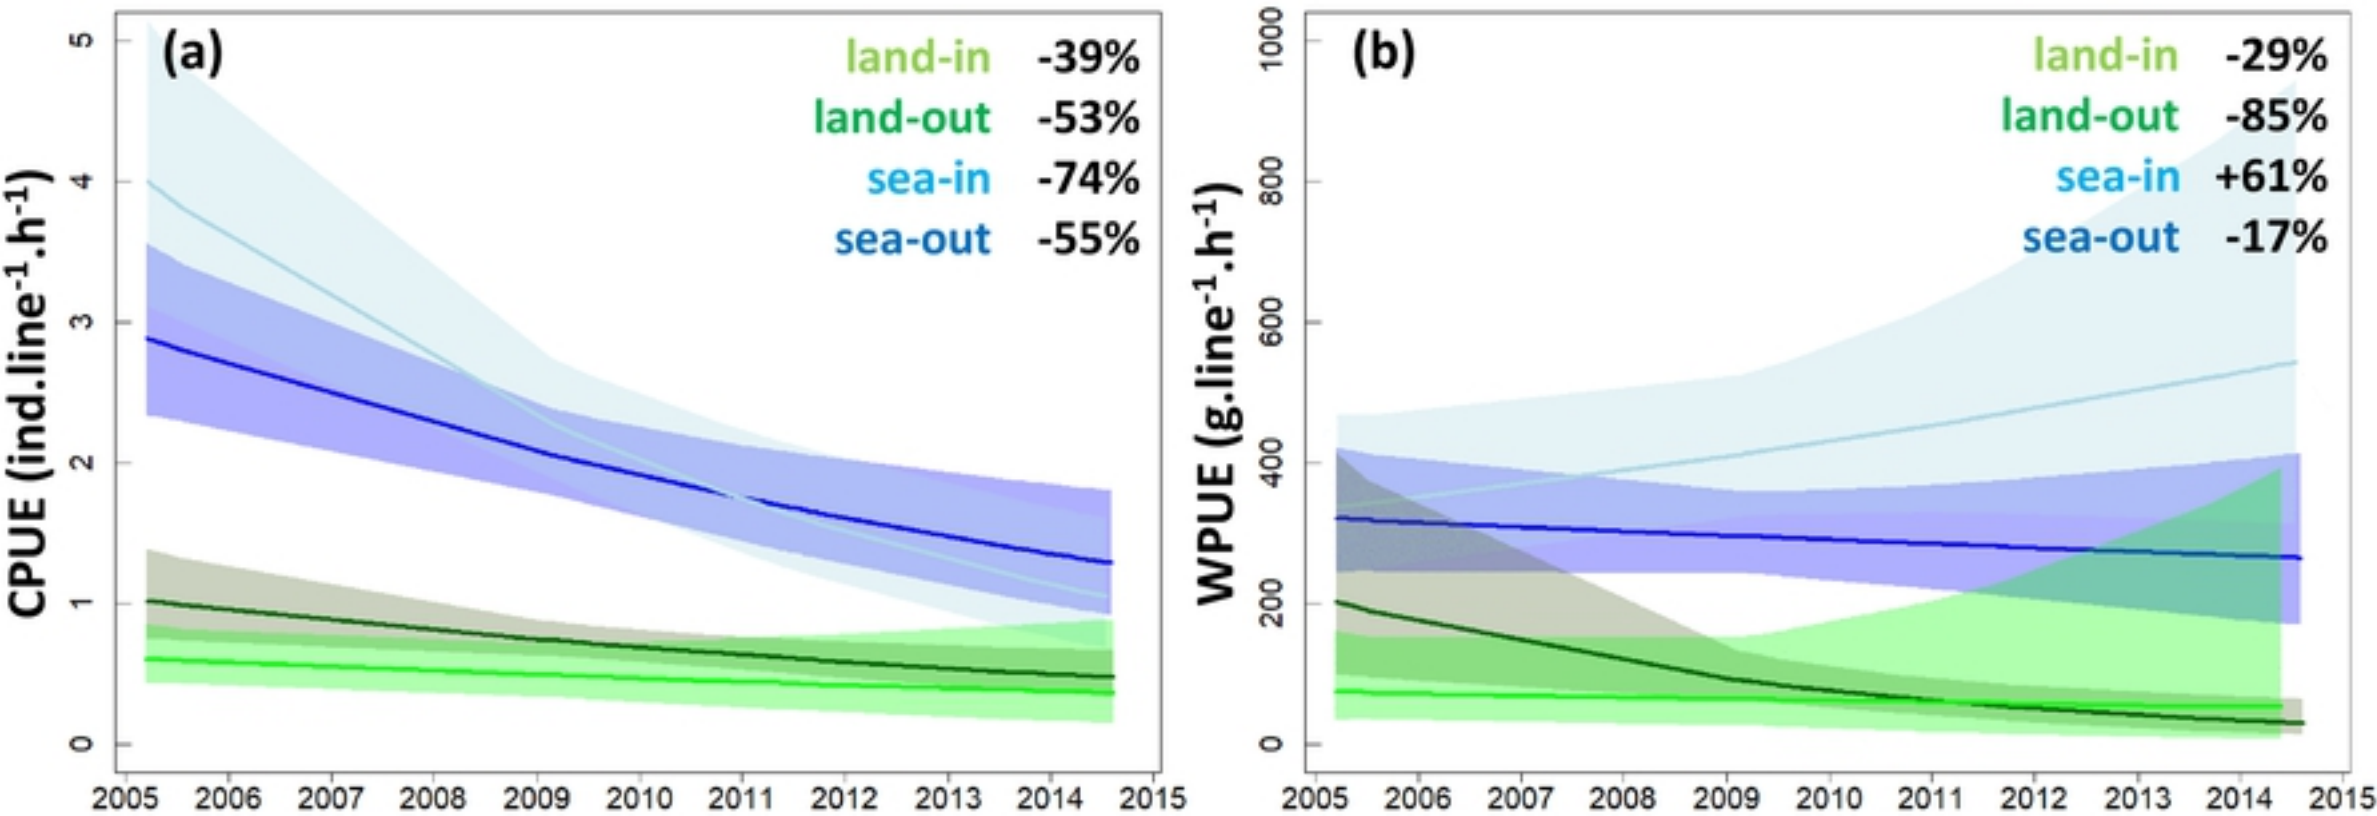

Fig 3



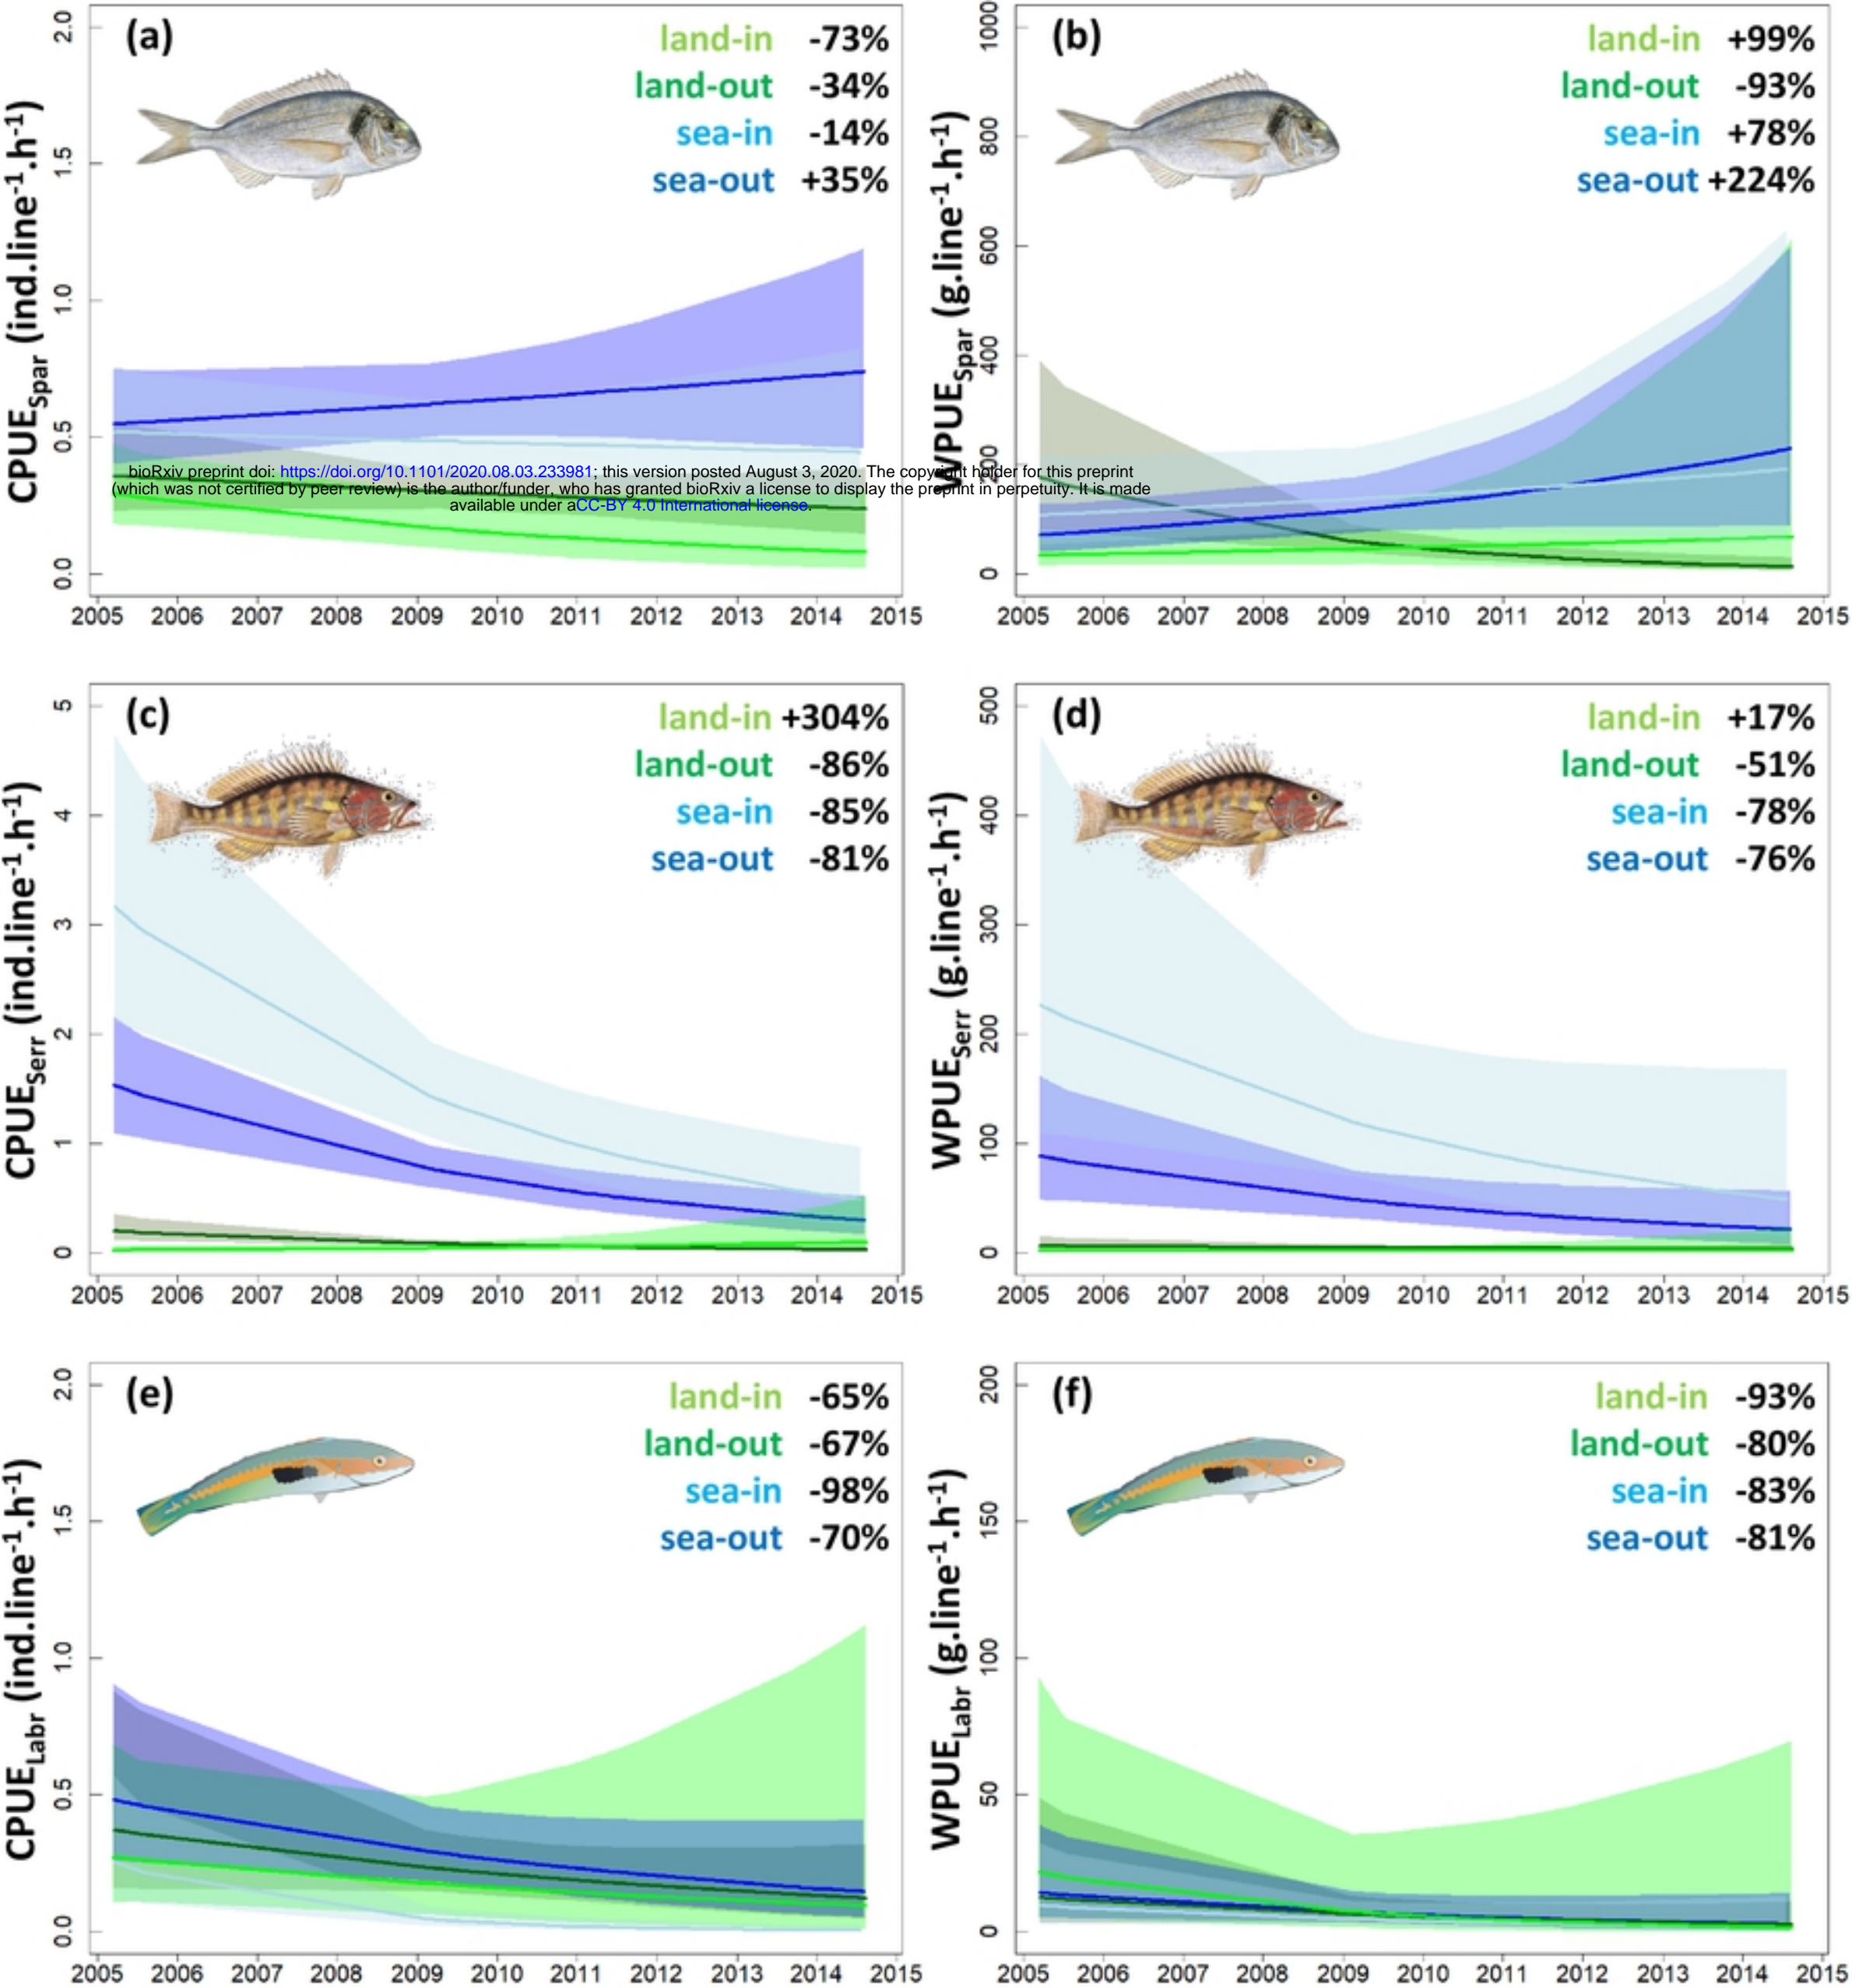

Fig 4
